# Supplementary material for: Drd3 Signaling in the Lateral Septum Mediates Early Life Stress-Induced Social Dysfunction
Source: PubMed Central journal article supplement — Neuron. 2018 Jan 3;97(1):195–208.e6. doi: 10.1016/j.neuron.2017.11.040 (PMC5766830; doi:10.1016/j.neuron.2017.11.040), 2018-01-03
Supplement: mmc1.pdf [file mmc1.pdf]

**Neuron, Volume 97**

## **Supplemental Information**

### **Drd3 Signaling in the Lateral Septum Mediates**

### **Early Life Stress-Induced Social Dysfunction**

**Sora Shin, Horia Pribiag, Varoth Lilascharoen, Daniel Knowland, Xiao-Yun Wang, and Byung Kook Lim**

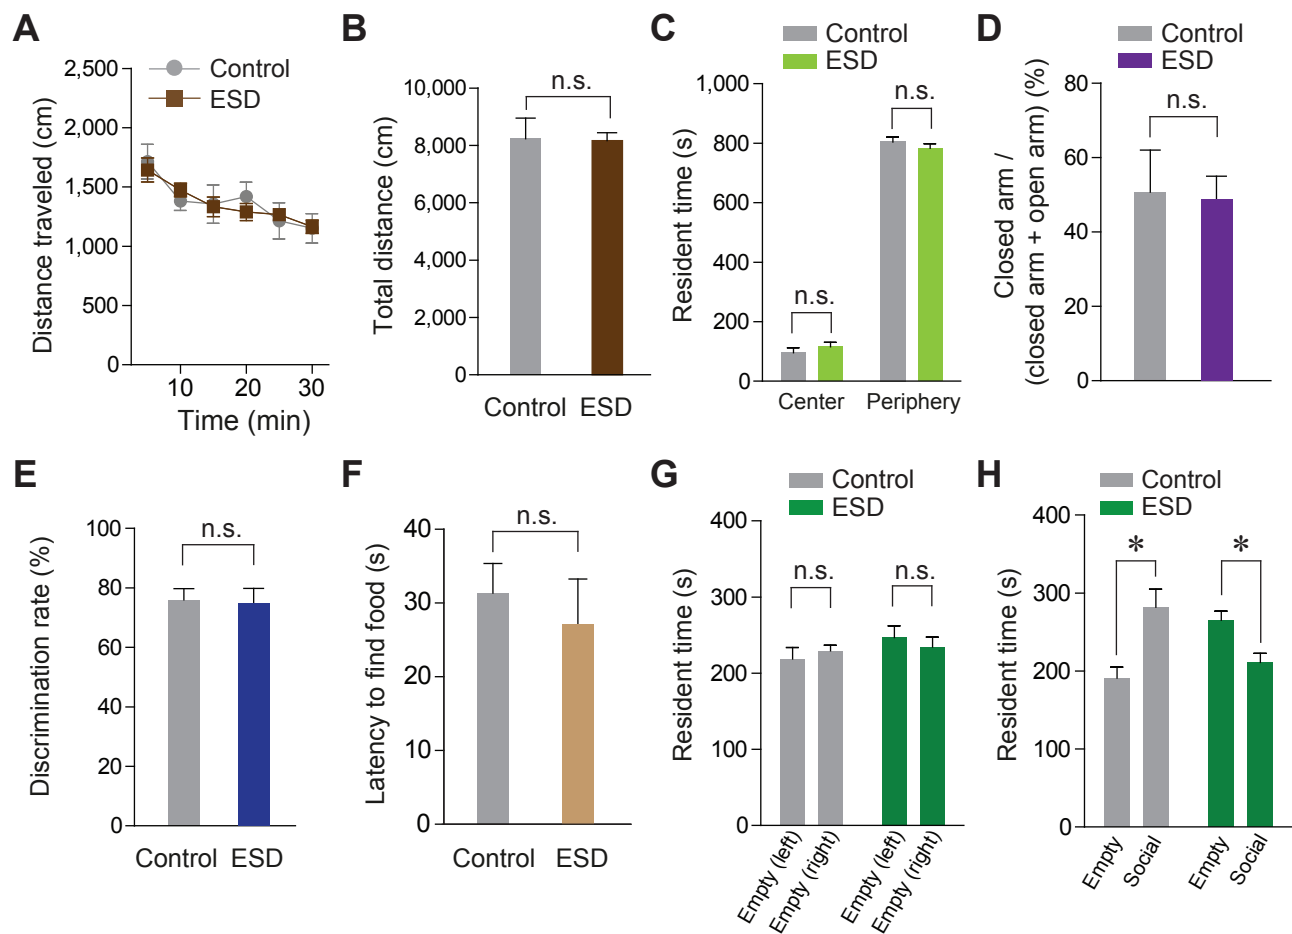

**Figure S1**

### **Figure S1. Basic Characteristics of ESD mice, Related to Figure 1**

(A and B) Locomotor activity was monitored for 30 min and analyzed in 5 min-bins (A) and total distance traveled was measured during the 30 min test period (B). No significant difference in locomotion was observed between control and ESD mice ( $n = 5$  per group).

(C) The resident time spent in the center or periphery of the open field. ESD mice showed normal levels of anxiety-like behaviors comparable to control mice in the open field test ( $n = 9, 11$  mice per group).

(D) Percentage time spent in the closed arms of elevated plus-maze. ESD mice had no observable anxiety in the elevated plus maze ( $n = 4, 6$  mice per group).

(E) Novel object recognition test. ESD mice showed the regular ability to recognize a novel object ( $n = 9$  per group).

(F) Buried food olfactory test. No significant difference in latency to find buried food was observed between control and ESD mice ( $n = 9, 8$  mice per group).

(G) The habituation session of three-chamber test. No side preference was apparent during the habituation for control and ESD mice ( $n = 7, 11$  mice per group).

(H) The test session of three-chamber test. Control mice spent more time in the side designated as the 'social' than the 'empty' compartment, whereas ESD mice did not show preferences for social compartment ( $n = 7, 11$  mice per group).

Significance for multiple comparisons: Paired  $t$ -test [(H)],  $*P < 0.05$ . n.s., not significant. Data are presented as mean  $\pm$  s.e.m.

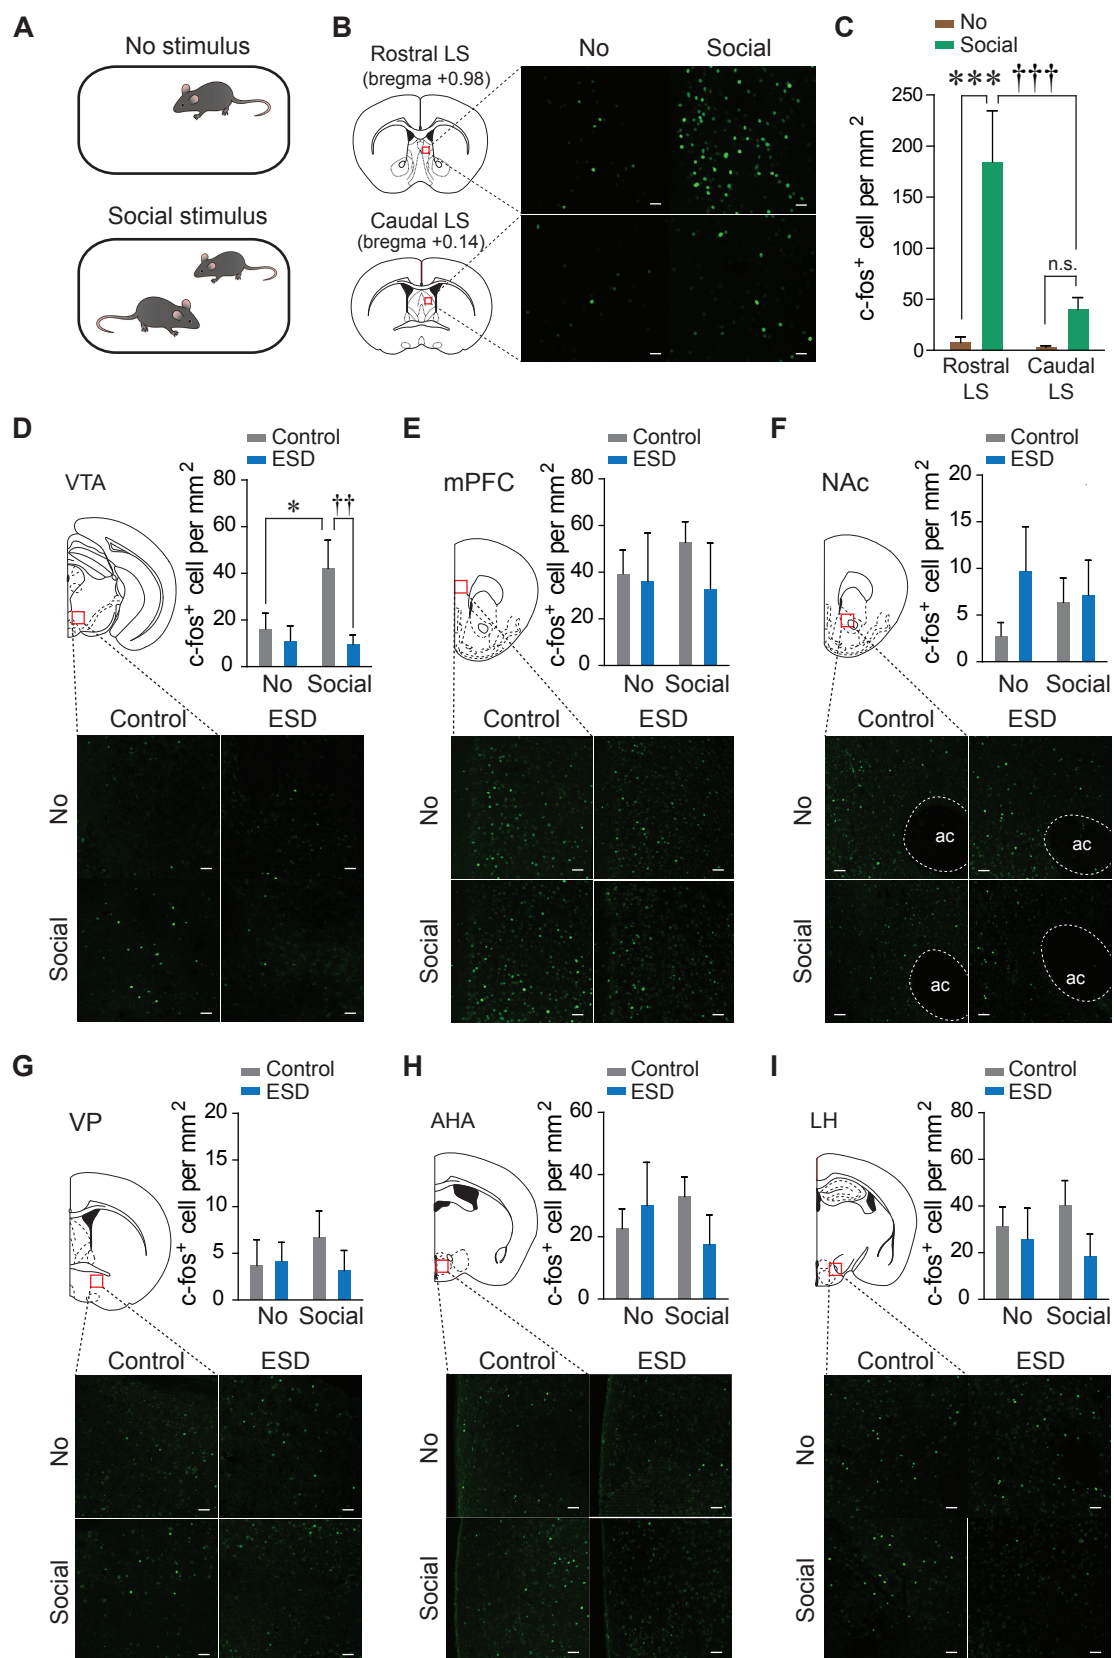

Figure S2

**Figure S2. Quantification of c-fos-positive Cells in the Several Brain Areas Following Exposure to Social Stimulus, Related to Figure 1**

(A) Schematics illustrating the experimental design for examining c-fos induction by social stimulus.

(B) Representative images of the rostral and caudal LS of control mice showing c-fos expression following exposure to a social stimulus. Scale bars, 20  $\mu$ m.

(C) Quantifications of c-fos-positive cells in the rostral and caudal LS. Social stimulus elicited a robust increase of c-fos expression in the rostral LS compared to the caudal LS ( $n = 6$  mice for each no stimulus group and  $n = 5$  mice for each social stimulus group).

(D to I) Quantifications (top) and representative images (bottom) of c-fos-positive cells in the VTA (D), mPFC (E), NAc (F), VP (G), AHA (H) and LH (I) between control and ESD mice after exposure to a social stimulus. Social stimulus induces a robust c-fos expression in the VTA (D) of control, but not of ESD mice ( $n = 6$  mice for each no stimulus group and  $n = 7$  mice for each social stimulus group). No changes in c-fos-positive cells within the mPFC, NAc, VP, AHA and LH. Scale bars, 50  $\mu$ m. ac, anterior commissure.

Significance for multiple comparisons: Two-way RM ANOVA; post-hoc, Fisher LSD [(C)], and Two-way ANOVA; post-hoc, Bonferroni [(D)],  $*P < 0.05$ ;  $***P < 0.001$ ;  $^{\dagger\dagger}P < 0.01$ ;  $^{\dagger\dagger\dagger}P < 0.001$ ; n.s., not significant. Data are presented as mean  $\pm$  s.e.m.

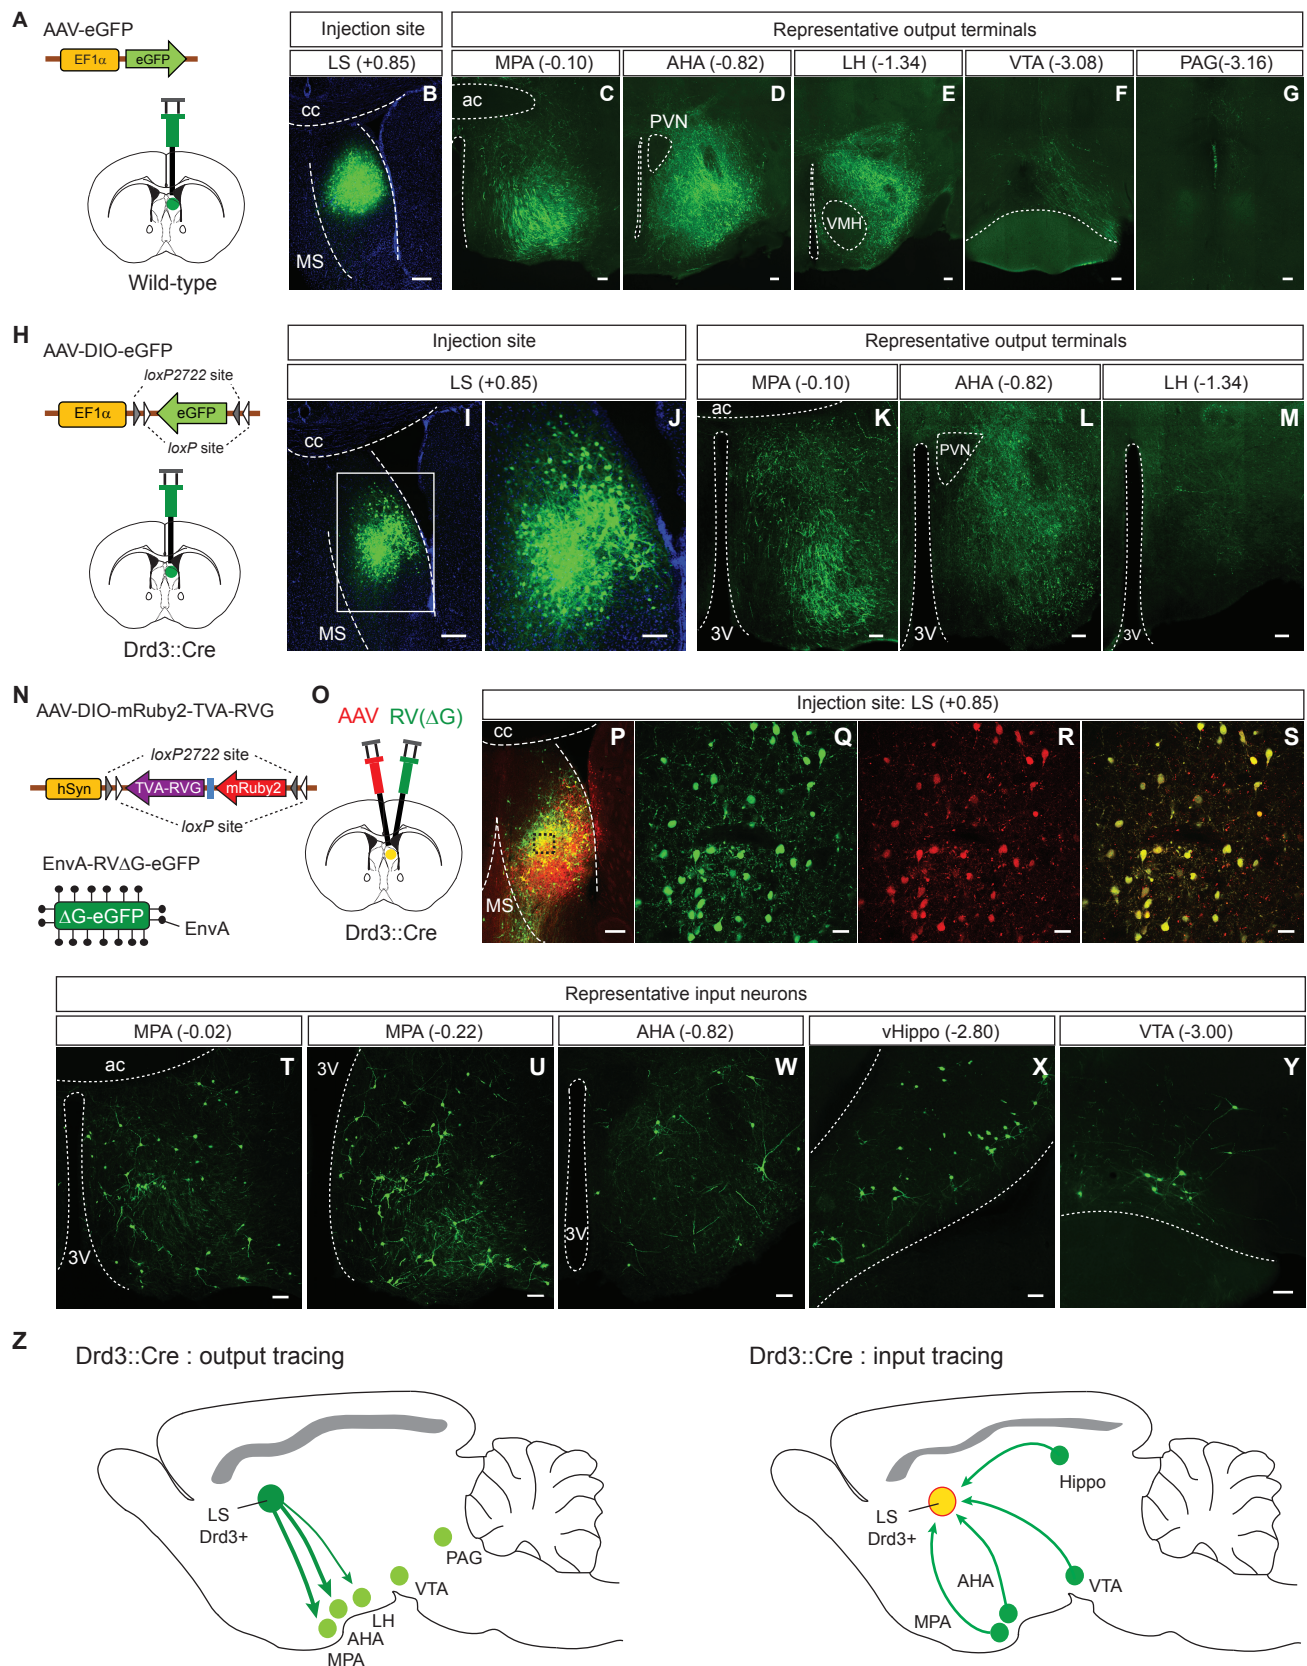

**Figure S3**

**Figure S3. The Afferent and Efferent Connections of Drd3<sup>LS</sup> neurons, Related to Figure 2**

(A) Schematic illustrating the injection of AAV expressing eGFP into the LS of wild-type mice.

(B) The image shows a robust eGFP expression in the LS cell bodies without cell-type specificity. Scale bar, 200  $\mu$ m. cc, corpus callosum; MS, medial septum.

(C to G) eGFP-positive axons from LS cell bodies were found in the MPA (C), AHA (D), LH (E), VTA (F), and PAG (G). Scale bars, 100  $\mu$ m. ac, anterior commissure; PVN, paraventricular nucleus; VMH, ventromedial hypothalamus.

(H) Schematic illustrating the injection of AAV expressing eGFP in a Cre-dependent manner into the LS of Drd3::Cre mice.

(I and J) The image showing robust eGFP expression in the Drd3<sup>LS</sup> neuronal cell bodies (I), and its high magnification image (J). Scale bars, 200  $\mu$ m, 100  $\mu$ m, respectively.

(K to M) eGFP-positive axons from Drd3<sup>LS</sup> cell bodies were found in the MPA (K), AHA (L), and LH (M). Scale bars, 100  $\mu$ m. PVN, paraventricular nucleus; 3V, third ventricle.

(N and O) Schematic showing the strategy for rabies-mediated retrograde tracing of monosynaptic inputs to Drd3<sup>LS</sup> neurons. Two different viruses were used. AAV expressing both EnvA receptor (TVA) and rabies virus glycoprotein (RVG) in a Cre-dependent manner (AAV-DIO-mRuby2-TVA-RVG); EnvA-pseudotyped glycoprotein (G)-deleted rabies virus expressing eGFP (EnvA-RV $\Delta$ G-eGFP) (N). AAV-DIO-mRuby2-TVA-RVG was firstly injected into the LS of Drd3::Cre mice. Two weeks later, EnvA-RV $\Delta$ G-eGFP was injected again into the same site (O).

(P) The confocal image showing starter cells (yellow, expressing both eGFP and mRuby2) in the LS of Drd3::Cre mice. Scale bar, 200  $\mu$ m.

(Q to S) Enlarged views of a region in the black dotted box showing in (P). Green, expressing eGFP (Q); Red, expressing mRuby2 (R); Yellow, expressing both eGFP and mRuby2 (S). Scale bars, 30  $\mu$ m.

(T to Y) Images showing rabies-labelled presynaptic neurons in the rostral and caudal part of MPA (T and U, respectively), AHA (W), vHippo (X), and VTA (Y). Scale bars, 100  $\mu$ m.

(Z) Schematic summary of the brain regions that receive Drd3<sup>LS</sup> neuronal projections (left) and that provide inputs to Drd3<sup>LS</sup> neurons (right).

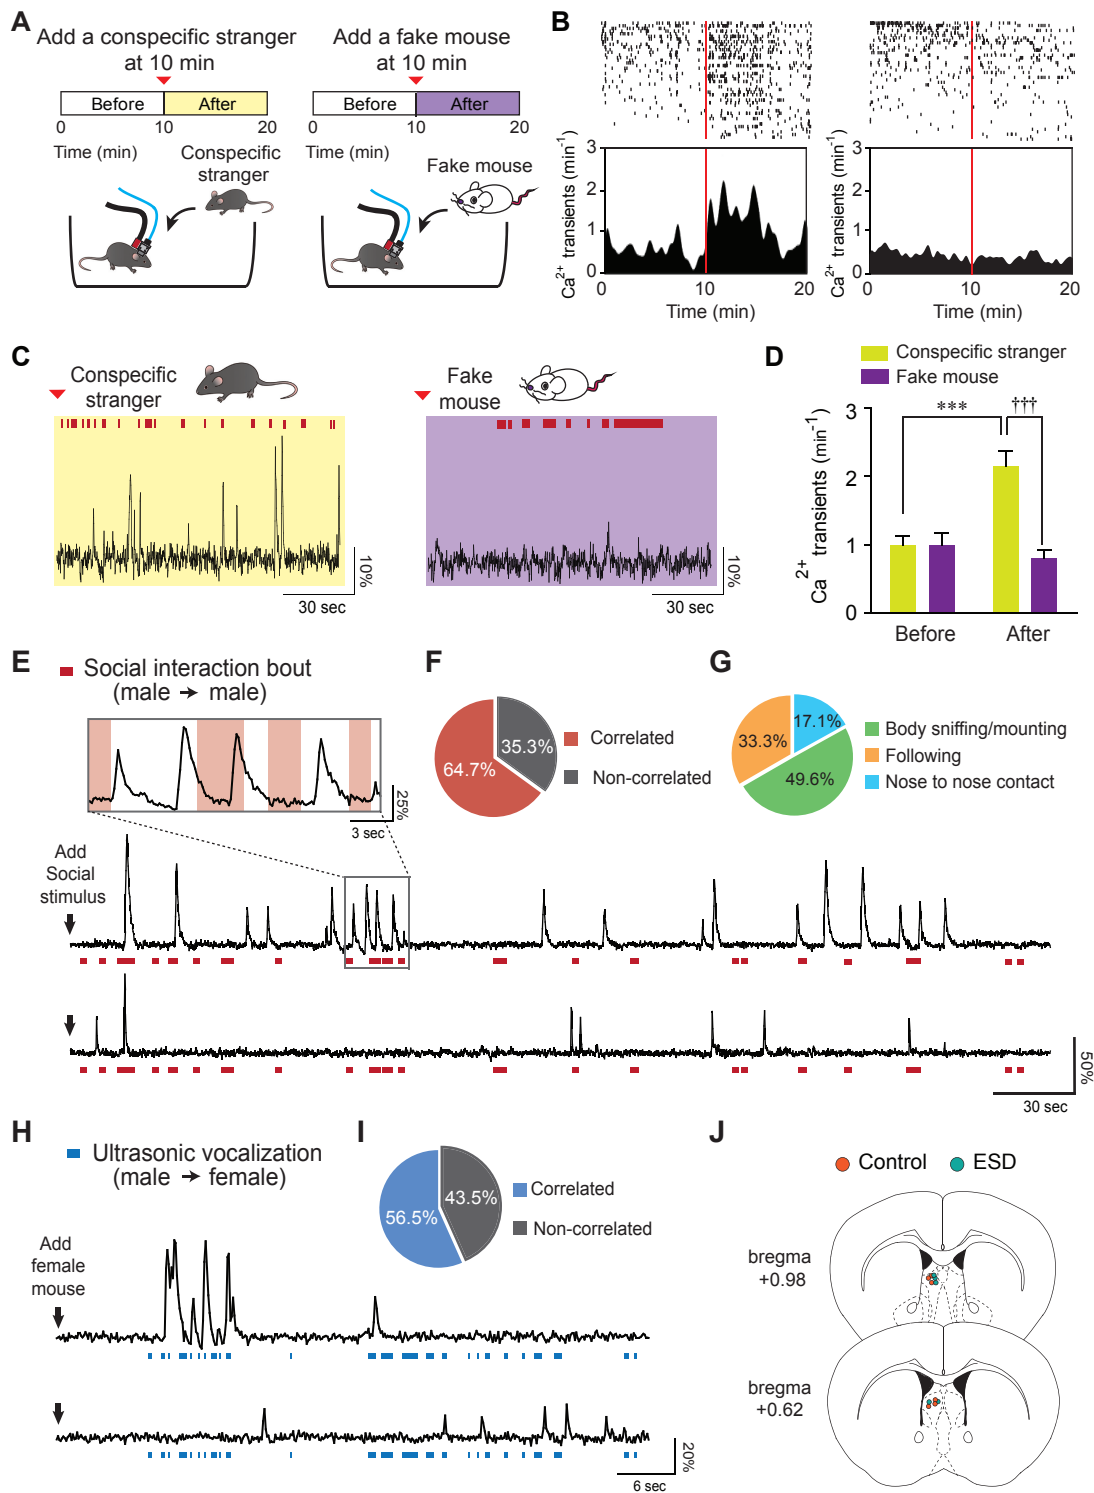

**Figure S4**

**Figure S4. *In vivo* Imaging of  $\text{Ca}^{2+}$  Dynamics from  $\text{Drd3}^{\text{LS}}$  Neurons of Control  $\text{Drd3}::\text{Cre}$  Mice during Social Interaction, Related to Figure 3**

(A) Schematic for *in vivo* imaging of  $\text{Ca}^{2+}$  dynamics in  $\text{Drd3}^{\text{LS}}$  neurons of control  $\text{Drd3}::\text{Cre}$  mice. Images for fluorescently encoded  $\text{Ca}^{2+}$  transients were acquired before and after the presentation of either a conspecific stranger (left) or a fake mouse (right).

(B) Raster plots (top) and peristimulus time histograms (bottom) showing  $\text{Drd3}^{\text{LS}}$  neuronal activity of control  $\text{Drd3}::\text{Cre}$  mice in response to either a conspecific stranger (left,  $n = 44$  cells from 3 mice) or a fake mouse (right,  $n = 48$  cells from 4 mice). The rows and ticks in the raster plots represent individual cells and single  $\text{Ca}^{2+}$  transient events, respectively. Vertical red bars mark the time the conspecific stranger or fake mouse was introduced.

(C) Representative  $\text{Ca}^{2+}$  activity traces from  $\text{Drd3}^{\text{LS}}$  neurons of control  $\text{Drd3}::\text{Cre}$  mice after presenting of a conspecific stranger (left) or a fake mouse (right), respectively. Red dashed areas indicate physical interaction bouts with a conspecific stranger or a fake mouse.

(D) Normalized average  $\text{Ca}^{2+}$  transients per min in  $\text{Drd3}^{\text{LS}}$  neurons of control  $\text{Drd3}::\text{Cre}$  mice before and after the presentation of a conspecific stranger or a fake mouse ( $n = 44$  cells from 3 mice for conspecific strangers,  $n = 48$  cells from 4 mice for fake mice).

(E) Example traces of  $\text{Drd3}^{\text{LS}}$  neuronal activity from two representative cells during male to male social interaction. Red dashed areas indicate social interaction bouts. Zoom-in of gray box (top) showed relating GCaMP6f signal of a  $\text{Drd3}^{\text{LS}}$  neuron below with light red shaded areas indicating social interaction.

(F and G) Pie charts indicate percentage of  $\text{Ca}^{2+}$  transient events from  $\text{Drd3}^{\text{LS}}$  neurons of control  $\text{Drd3}::\text{Cre}$  mice correlating with social interaction bouts (F) and with different subtypes of social interaction behaviors (G) during the first 2 min-recording after introducing a male intruder ( $n = 33$  cells from 3 mice).

(H) Example traces of Drd3<sup>LS</sup> neuronal activity from two representative cells during USV tests. A female mouse was added for recording USVs produced by male experimental mice. Blue dashed areas indicate the generation of USVs.

(I) Pie charts indicate percentage of Ca<sup>2+</sup> transient events from Drd3<sup>LS</sup> neurons of control Drd3::Cre mice correlating with USVs during the first 1-min recording after introducing a female intruder (n = 26 cells from 3 mice).

(J) Locations of the GRIN lens in the Drd3::Cre mice included in Figures 3G to 3J. Symbols represent the different groups: orange circle, control Drd3::Cre mice; blue circle, ESD Drd3::Cre mice.

Significance for multiple comparisons: Two-way RM ANOVA; post-hoc, Fisher LSD [(D)], \*\*\* $P < 0.001$ ; ††† $P < 0.001$ . Data are presented as mean  $\pm$  s.e.m.

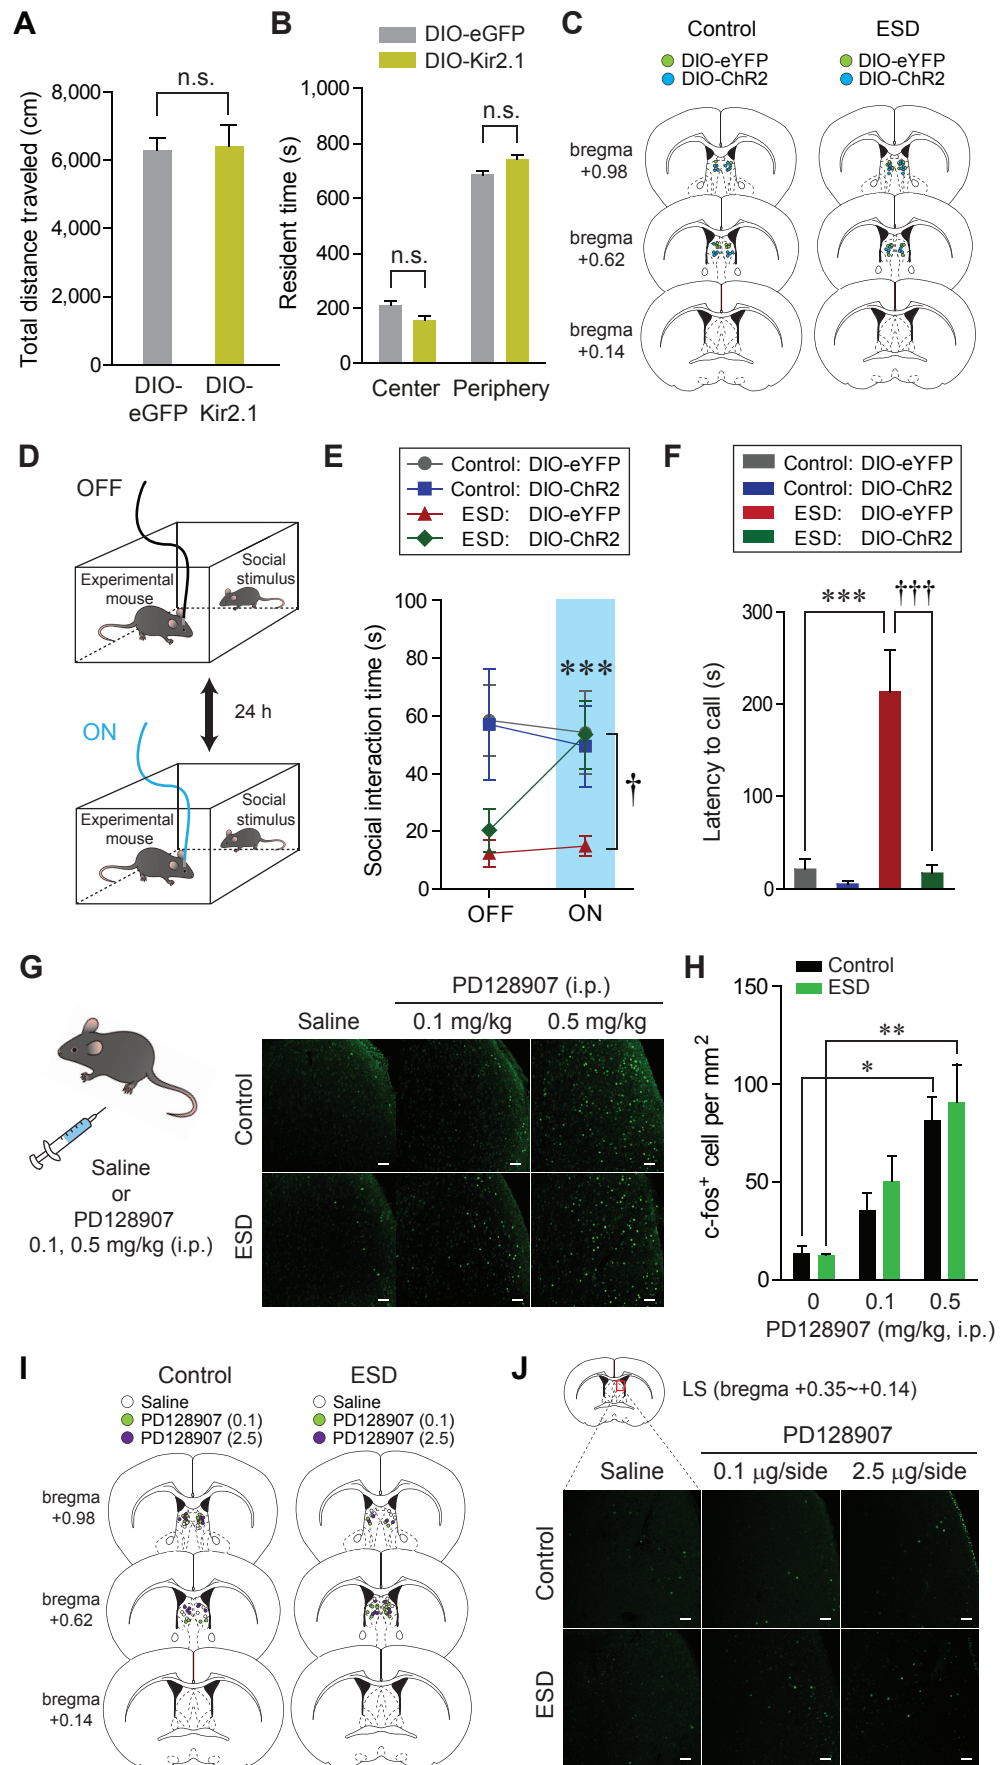

**Figure S5**

**Figure S5. Modulation of Drd3<sup>LS</sup> Neuronal Activity affects ESD-induced Abnormal Social Behaviors and Pharmacological Activation of Drd3 signaling Increases LS Neuronal Activity, Related to Figures 4 and 5**

(A) Total distance traveled during the 15-min locomotion test. Viral-mediated Kir2.1 expression in the Drd3<sup>LS</sup> neurons of control Drd3::Cre mice did not alter the locomotion (n = 3, 4 mice per group).

(B) Injection of the AAV-DIO-Kir2.1 into the LS of control Drd3::Cre mice had no effects on anxiety-like behaviors in open field tests (n = 3, 4 mice per group).

(C) Locations of the optic fibers in Drd3::Cre mice included in Figures 4I, 4K. Symbols represent the different groups: light green circle, AAV-DIO-eYFP; blue circle, AAV-DIO-ChR2.

(D) The experimental design of reciprocal social interaction tests with optical stimulations. Five-minutes testing sessions were conducted twice and counterbalanced for order with a 24 h interval between laser ON and laser OFF conditions.

(E) Photoactivation of Drd3<sup>LS</sup> neurons rescued the amount of time ESD Drd3::Cre mice spent in direct social interaction (sniffing, following, mounting and nose to nose contacts) to the levels of control Drd3::Cre mice (n = 5, 6 mice for each control group and n = 6, 6 mice for each ESD group; \*\*\* $P < 0.001$  compared with ESD mice expressing DIO-ChR2 at OFF state; <sup>†</sup> $P < 0.05$  compared with ESD mice expressing DIO-eYFP at ON state).

(F) Photoactivation of Drd3<sup>LS</sup> neurons in ESD Drd3::Cre mice restored the latency to make the first USV call (n = 7, 8 mice for each control group and n = 8, 11 mice for ESD group).

(G) Schematics for the intraperitoneal injections of the saline or PD128907 to wild-type mice (left). Representative images of c-fos staining in the LS of control and ESD mice following saline or PD128907 injection (0.1 or 0.5 mg/kg, i.p.). Scale bars, 50  $\mu$ m (right).

(H) Quantifications of c-fos-positive cells in the LS of control or ESD mice 1 h after saline or PD128907 administration. The high dose of PD128907 activated the LS neurons both in control and ESD mice (n = 3, 4 and 4 mice for each control group and n = 3, 3 and 6 mice for each ESD

group).

(I) Locations of the injection cannula tips in the mice included in Figure 5B. Symbols represent the different groups: white circle, saline; light green circle, PD128907 (0.1 µg/side); purple circle, PD128907 (2.5 µg/side).

(J) Representative images of c-fos immunoreactivity in the caudal LS where cannula tips were not placed. No changes were observed in the c-fos expression levels, regardless of drug treatments.

Significance for multiple comparisons: Two-way RM ANOVA; post-hoc, Fisher LSD [(E)], and Two-way ANOVA; post-hoc, Bonferroni [(F), (H)], \* $P < 0.05$ ; \*\* $P < 0.01$ ; \*\*\* $P < 0.001$ ; <sup>†</sup> $P < 0.05$ ; <sup>†††</sup> $P < 0.001$ . n.s., not significant. Data are presented as mean ± s.e.m.

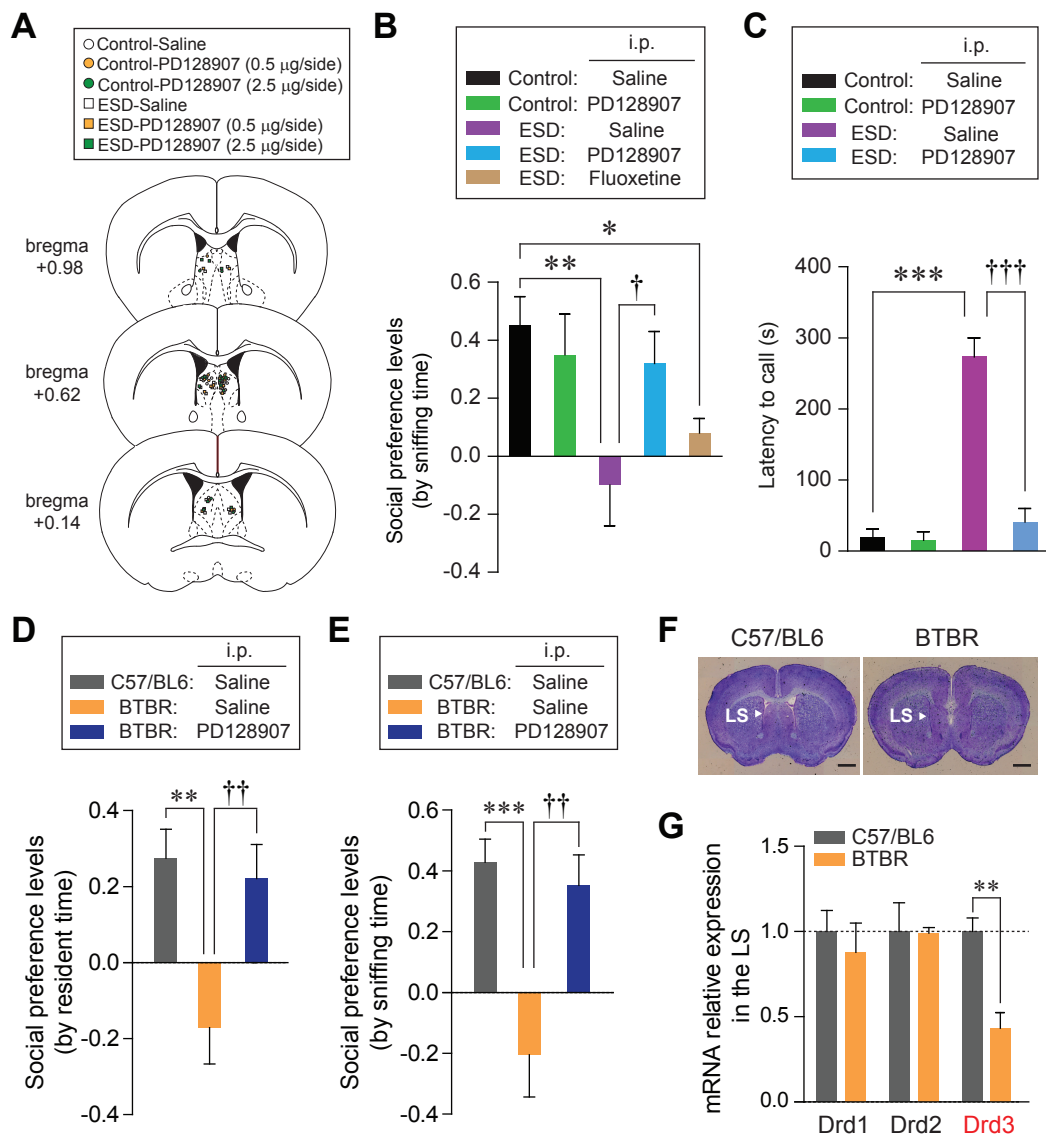

**Figure S6**

**Figure S6. Administration of Drd3 Agonist, PD128907 (0.5 mg/kg, i.p.) Reverses Social Impairments in both ESD and BTBR mice, Related to Figure 6**

(A) Locations of the injection cannula tips in the mice included in Figure 6C. Symbols represent the different groups: white circle, control-saline; yellow circle, control-PD128907 (0.5 µg/side); green circle, control-PD128907 (2.5 µg/side); white rectangle, ESD-saline; yellow rectangle, ESD- PD128907 (0.5 µg/side); green rectangle, ESD-PD128907 (2.5 µg/side).

(B) Social preference levels based on sniffing time in three-chamber test. PD128907 administration rescued impaired social preferences in ESD mice to the level of control mice, whereas chronic fluoxetine did not (n = 6, 5 mice for each control group, n = 6, 6 and 5 mice for each ESD group).

(C) PD128907 administration restored the latency to produce the first USV call emitted by ESD mice (n = 5, 6 mice for each control group, n = 6, 6 mice for each ESD group).

(D and E) PD128907 administration rescued impaired social preference of BTBR mice, a traditional animal model of ASD, based on resident time (D) and on sniffing time (E) in three-chamber test (n = 10 mice for C57/BL6 group, n = 8, 8 mice for each BTBR group).

(F) Representative images of coronal brain slices showing the LS of C57/BL6 (left) and BTBR mice (right). Scale bars, 1 mm.

(G) qRT-PCR analysis of Drd3 mRNA expression from the LS of C57/BL6 versus BTBR mice (n = 5 mice for C57/BL6 group, n = 4 mice for BTBR group).

Significance for multiple comparisons: One-way ANOVA; post-hoc, Fisher LSD [(B), (D), and (E)], Two-way ANOVA; post-hoc, Bonferroni [(C)], and Unpaired t-test [(G)], \* $P < 0.05$ ; \*\* $P < 0.01$ ; \*\*\* $P < 0.001$ ; † $P < 0.05$ ; †† $P < 0.01$ ; ††† $P < 0.001$ . Data are presented as mean ± s.e.m.

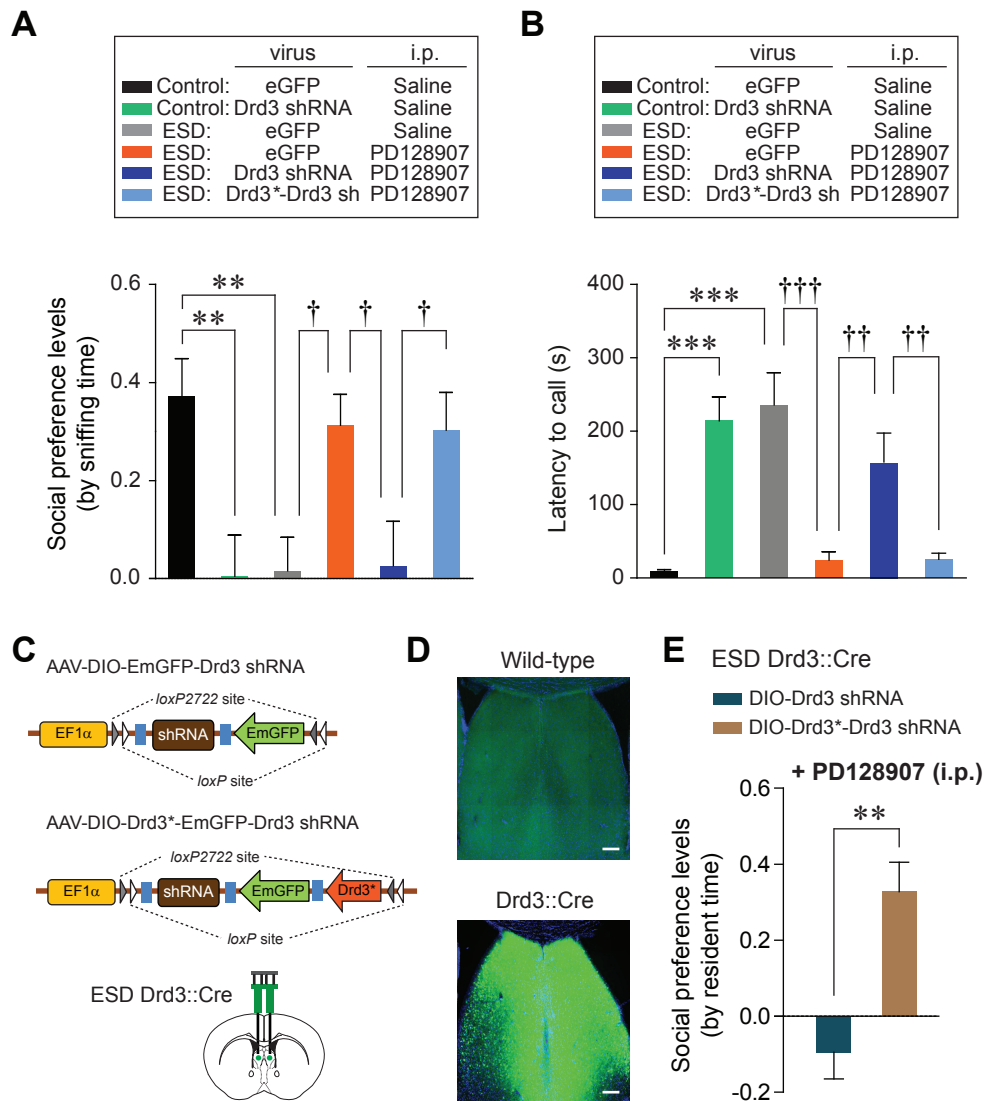

**Figure S7**

**Figure S7. Administration of Drd3 Agonist, PD128907 (0.5 mg/kg, i.p.) Reverses ESD-Induced Social Impairments via Drd3<sup>LS</sup> Neuronal Signaling, Related to Figure 6**

(A and B) Knock-down of Drd3 by injection of AAV-Drd3-shRNA into the LS attenuated social preference levels based on sniffing time in three-chamber test (A) and delayed latency for making the first USV call (B) in control mice. It also blocked PD128907-induced rescue of social dysfunctions in ESD mice. However, the expression of shRNA-resistant Drd3 (Drd3\*, mutant form is indicated by asterisk) together with shRNA against Drd3 (AAV-Drd3\*-Drd3 sh) did not block PD128907-induced rescue of those social impairments in ESD mice. (A, n = 11, 10 mice for each control group, n = 9, 10, 11 and 11 mice for each ESD group). (B, n = 8, 10 mice for each control group, n = 7, 8, 9 and 10 mice for each ESD group).

(C) Schematic illustrating the bilateral injections of AAV expressing Drd3 shRNA or Drd3\*-Drd3 shRNA in a Cre-dependent manner into the LS of ESD Drd3::Cre mice.

(D) Images of the Drd3\*-EmGFP-Drd3 shRNA expression after bilateral injections of AAV-DIO-Drd3\*-EmGFP-Drd3 shRNA into the LS of wild-type (top) and Drd3::Cre mice (bottom). Scale bars, 250  $\mu$ m.

(E) Social preference levels based on resident time in three-chamber test. Selective expression of Drd3\*-Drd3 shRNA in Drd3<sup>LS</sup> neurons of ESD Drd3::Cre mice still did not preclude PD128907-induced rescue of impaired social preference (n = 4 mice per group).

Significance for multiple comparisons: One-way ANOVA; post-hoc, Fisher LSD [(A), (B)], Unpaired t-test [(E)], \*\* $P < 0.01$ ; \*\*\* $P < 0.001$ ;  $^{\dagger}P < 0.05$ ;  $^{\dagger\dagger}P < 0.01$ ;  $^{\dagger\dagger\dagger}P < 0.001$ . Data are presented as mean  $\pm$  s.e.m.
